# Supplementary material for: Determinants of Length of Stay After Vaginal Deliveries in the Friuli Venezia Giulia Region (North-Eastern Italy), 2005–2015
Source: Springer Nature journal article supplement (doi:10.1038/s41598-020-62774-6), 2020-04-03
Supplement: MOESM1 [file 41598_2020_62774_MOESM1_ESM.pdf]

## **Determinants of Length of Stay After Vaginal Deliveries in the Friuli Venezia Giulia Region (North-Eastern Italy), 2005-2015**

Cegolon L,<sup>1,2</sup> Maso G,<sup>1</sup> Heymann WC,<sup>3,4</sup> Bortolotto M,<sup>5</sup> Cegolon A,<sup>6</sup> Mastrangelo G<sup>7</sup>

1. Local Health Unit N.2 “*Marca Trevigiana*”, Public Health Department, Veneto Region, Treviso, Italy

2. Institute for Maternal & Child Health, IRCCS “*Burlo Garofolo*”, Trieste, Italy

3. Florida State University, Department of Clinical Sciences, College of Medicine, Sarasota, Florida, USA

4. Florida Department of Health, Sarasota County Health Department, Sarasota, Florida, USA

5. Padua University, FISPPA Department, Padua, Italy

6. University of Macerata, Department of Political, Social & International Relationships, Macerata, Italy

7. Padua University, Department of Cardio-Thoracic & Vascular Sciences, Padua, Italy

### **Correspondence**

Dr. Luca Cegolon, MD, MSc, PhD

Local Health Unit N.2 “*Marca Trevigiana*”

Public Health Department

Treviso, Italy

Email: [l.cegolon@gmail.com](mailto:l.cegolon@gmail.com)

**Supplementary Table 1a.** Multivariable logistic regression model for the probability of length of stay (LoS) > ED for spontaneous vaginal deliveries (SVD, 2 days cutoff) and instrumental vaginal deliveries (IVD, 3 days cutoff). Odds ratio (OR) with 95% confidence interval (95%CI); Benjamini Hochberg (BH) p-value set at 5% discovery rate (bottom of each cell). Obs.= complete (case analysis) observations.

| FACTORS<br>(Reference category)                                              | CLASSES                    | OR (95%CI)<br>BH p-value                 |                                         |
|------------------------------------------------------------------------------|----------------------------|------------------------------------------|-----------------------------------------|
|                                                                              |                            | SVD (72,786 obs.)<br>LoS > 2 vs. LoS ≤ 2 | IVD (7,020 obs.)<br>LoS > 3 vs. LoS ≤ 3 |
| Calendar year (2005-2015)<br><br>Delivery day of week<br>(Reference= Monday) | Linear term                | 0.95 (0.95; 0.96)<br>4.74E-47            | 0.97 (0.95; 0.99)<br>0.0033             |
|                                                                              | Thursday                   | NS                                       | 1.34 (1.08; 1.65)<br>0.0216             |
|                                                                              | Friday                     | 1.11 (1.04; 1.19)<br>0.0046              | NS                                      |
| Seasonality<br>(Reference: June-August)                                      | September-November         | 1.08 (1.03; 1.14)<br>0.0034              | NS                                      |
|                                                                              | December-February          | 1.19 (1.13; 1.26)<br>3.45E-11            | NS                                      |
|                                                                              | March-May                  | 1.17 (1.12; 1.24)<br>1.72E-09            | NS                                      |
| Number of previous livebirths<br>(Reference=0)                               | 1                          | 0.25 (0.24; 0.26)<br>0                   | 0.39 (0.33; 0.47)<br>8.43E-22           |
|                                                                              | 2                          | 0.16 (0.15; 0.17)<br>0                   | 0.24 (0.14; 0.39)<br>5.78E-08           |
|                                                                              | 3                          | 0.14 (0.12; 0.16)<br>1.60E-163           | 0.19 (0.05; 0.67)<br>0.0261             |
|                                                                              | 4                          | 0.16 (0.13; 0.20)<br>2.64E-66            | NS                                      |
| Number of previous CS<br>(Reference =0)                                      | 1                          | 1.47 (1.31; 1.64)<br>5.22E-11            | NS                                      |
| Mother nationality<br>(Reference = Italian)                                  | Non-EU                     | 1.36 (1.28; 1.45)<br>1.36E-22            | NS                                      |
| Mother's age<br>(Reference = 20-24 years)                                    | 25-29                      | 1.10 (1.01; 1.18)<br>0.0347              | 0.74 (0.59; 0.94)<br>0.0325             |
|                                                                              | 30-34                      | 1.22 (1.12; 1.33)<br>6.25E-06            | NS                                      |
|                                                                              | 35-39                      | 1.46 (1.33; 1.60)<br>1.64E-15            | NS                                      |
|                                                                              | 40-44                      | 1.71 (1.52; 1.93)<br>4.80E-18            | NS                                      |
|                                                                              | 45+                        | 3.90 (2.38; 6.40)<br>1.83E-07            | NS                                      |
| Mother educational level<br>(Reference=University/more)                      | Primary/none               | 1.21 (1.04; 1.42)<br>0.0224              | NS                                      |
| Mother's occupation<br>(Reference=unemployed/<br>student/housewife)          | Self-employed/entrepreneur | 0.90 (0.84; 0.97)<br>0.0133              | NS                                      |
|                                                                              | Employed (other)           | 0.94 (0.88; 0.99)<br>0.0393              | NS                                      |
| Father's age<br>(Reference =30-34 years)                                     | 20-24                      | 0.83 (0.73; 0.95)<br>0.0096              | NS                                      |
|                                                                              | 25-29                      | 0.90 (0.84; 0.96)<br>0.0038              | 0.74 (0.60; 0.90)<br>0.0095             |
| Gestational age<br>(Reference = 37-40 weeks)                                 | <29                        | 0.21 (0.12; 0.36)<br>9.87E-08            | NS                                      |
|                                                                              | 33-36                      | 1.76 (1.57; 1.98)<br>5.47E-21            | 2.54 (1.77; 3.65)<br>3.06E-06           |
|                                                                              | 41+                        | 0.93 (0.89; 0.98)<br>0.0069              | NS                                      |
| Birthweight<br>(Reference = 2.5-4.0 Kg)                                      | <2.0                       | 0.38 (0.27; 0.53)<br>4.97E-08            | NS                                      |
|                                                                              | 2.0-2.5                    | 1.57 (1.37; 1.79)<br>2.93E-10            | NS                                      |
|                                                                              | >4.0                       | 1.17 (1.09; 1.26)<br>7.09E-05            | NS                                      |
| Multiple birth<br>(Reference= singleton)                                     | Twins or more              | 2.35 (1.60; 3.46)<br>3.53E-05            | NS                                      |

|                                                              |                         |                               |                                |
|--------------------------------------------------------------|-------------------------|-------------------------------|--------------------------------|
| Placenta weight<br>(Reference = 500-999g)                    | <500                    | 1.07 (1.01; 1.12)<br>0.0224   | NS                             |
|                                                              | 600-999                 | 1.07 (1.02; 1.11)<br>0.0045   | 1.20 (1.05; 1.36)<br>0.0217    |
|                                                              | 1,000-1,500             | 1.64 (1.19; 2.26)<br>0.0041   | NS                             |
| Hypertension/diabetes<br>(Reference = No)                    | Yes                     | 1.46 (1.24; 1.73)<br>2.28E-05 | NS                             |
| Eclampsia/pre-eclampsia<br>(Reference = No)                  | Yes                     | 2.97 (2.11; 4.20)<br>1.63E-09 | 3.44 (1.97; 5.99)<br>6.50E-05  |
| N. obstetric checks in pregnancy<br>(Reference = 4-7)        | <4                      | 0.92 (0.87; 0.97)<br>0.0037   | NS                             |
| N. US scans in pregnancy<br>(Reference < 4)                  | 6+                      | 1.07 (1.01; 1.13)<br>0.0385   | NS                             |
| Chorionic villous sampling<br>(Reference = No)               | Yes                     | 1.13 (1.02; 1.25)<br>0.0277   | NS                             |
| Rh iso-immunization<br>(Reference = No)                      | Yes                     | 3.11 (1.39; 7.00)<br>0.0100   | 21.93 (2.23; 216.10)<br>0.0237 |
| Labour mode<br>(Reference = Spontaneous)                     | Induced                 | 1.57 (1.48; 1.66)<br>4.79E-54 | 1.21 (1.05; 1.39)<br>0.0262    |
|                                                              | Augmented               | 1.15 (1.06; 1.24)<br>0.0009   | NS                             |
| Labour analgesia<br>(Reference = No)                         | Yes                     | 0.86 (0.82; 0.91)<br>4.57E-08 | 1.22 (1.07; 1.38)<br>0.0090    |
| Neonatal status<br>(Reference = Liveborn)                    | Stillborn               | 0.02 (0.01; 0.03)<br>8.50E-45 | NS                             |
| Premature rupture of<br>membranes (Ref = No)                 | Yes                     | 1.08 (1.02; 1.15)<br>0.0235   | NS                             |
| Non reassuring fetal status<br>(Reference = No)              | Yes                     | 1.75 (1.22; 2.49)<br>0.0045   | NS                             |
| Obstructed labour<br>(Reference = No)                        | Yes                     | 1.63 (1.23; 2.14)<br>0.0012   | NS                             |
| Apgar score at 5 minutes<br>(Reference = 8+)                 | < 8                     | NS                            | 1.52 (1.14; 2.03)<br>0.0155    |
| Placental secondment<br>(Reference=spontaneous)              | Manual/<br>instrumental | 2.53 (2.09; 3.06)<br>4.22E-21 | 1.80 (1.39; 2.32)<br>4.29E-05  |
| Congenital Malformations<br>at Birth: Present                | Absent                  | 1.21 (1.02; 1.43)<br>0.0400   |                                |
| Placenta previa/abruptio p./ante-<br>partum haemorrhage: Yes | No                      | 1.65 (1.04; 2.61)<br>0.0463   |                                |

**Results of Supplementary Tables 1a and 1b belong to the same model of multivariable logistic regression models, adjusted for the following factors:**

**SVD:**

- **Health care setting and timeframe:** hospital; calendar year; delivery day of week; seasonality;
- **Maternal health factors:** maternal age; hypertension/diabetes; chorionic villous sampling; number of obstetric checks in pregnancy; number of US scans in pregnancy; neonatal status;
- **Child's fragility factors:** multiple birth; ICU admission
- **Child's size factors:** gestational age; birthweight; placenta weight;
- **Obstetric history factors:** number of previous livebirths; number of previous CS;
- **Socio-demographic factors:** father's age; mother's nationality; mother's education; mother's occupation;
- **Obstetric factors:** eclampsia/pre-eclampsia; polyhydramnios; non-reassuring fetal status; placenta previa/abruptio placenta/ ante-partum haemorrhage; PROM; labour mode; labour analgesia; Rh iso-immunization; congenital malformations at birth

**IVD:**

- **Health care setting and timeframe:** hospital; calendar year; delivery day of week;
- **Maternal health factors:** mother's age; neonatal status; any medical assisted fertilization;
- **Child's fragility factors:** Apgar score at 5 minutes; multiple birth;
- **Child's size factors:** gestational age; placenta weight;
- **Obstetric history factors:** number of previous livebirths;
- **Socio-demographic factors:** father's age; mother's educational level;
- **Obstetric factors:** eclampsia/pre-eclampsia; PROM; labour mode; labour analgesia; presentation; Rh iso-immunization; placental secondment.

**Supplementary Table 1b.** Multivariable logistic regression model for the probability of length of stay (LoS) > ED for spontaneous vaginal deliveries (SVD, 2 days cutoff) and instrumental vaginal deliveries (IVD, 3 days cutoff). Hospital estimates (Odds ratio, OR) with 95% confidence interval (95%CI); Benjamini Hochberg (BH) p-value set at 5% discovery rate (bottom of each cell). Obs.= complete (case analysis) observations.

| HOSPITAL | DELIVERY MODE<br>OR (95%CI); with BH p value |                                         |
|----------|----------------------------------------------|-----------------------------------------|
|          | SVD (72,786 obs.)<br>LoS > 2 vs. LoS ≤ 2     | IVD (7,020 obs.)<br>LoS > 3 vs. LoS ≤ 3 |
| A        | Reference                                    | Reference                               |
| B        | 91.48 (80.23; 104.32)<br>0                   | 8.66 (7.05; 10.63)<br>1.16E-92          |
| C        | 5.02 (4.66; 5.41)<br>0                       | NS                                      |
| D        | 27.94 (23.56; 33.14)<br>0                    | 9.03 (5.85; 13.93)<br>7.43E-22          |
| E        | 8.35 (7.62; 9.14)<br>0                       | 2.36 (1.78; 3.13)<br>1.89E-08           |
| F        | 2.89 (2.65; 3.16)<br>6.67E-127               | NS                                      |
| G        | 0.80 (0.75; 0.86)<br>1.44E-09                | NS                                      |
| H        | 2.84 (2.66; 3.02)<br>1.78E-223               | 1.60 (1.27; 2.03)<br>0.0004             |
| I        | 10.52 (9.57; 11.55)<br>0                     | 2.98 (2.26; 3.92)<br>1.10E-13           |
| J        | 2.38 (2.23; 2.54)<br>7.27E-146               | 2.81 (2.24; 3.52)<br>4.40E-18           |
| K        | 10.40 (9.55; 11.34)<br>0                     | 2.53 (1.99; 3.52)<br>2.75E-13           |

Results of Supplementary Tables 1a and 1b belong to the same model of multivariable logistic regression models, adjusted for the following factors:

**SVD:**

- **Health care setting and timeframe:** hospital; calendar year; delivery day of week; seasonality
- **Maternal health factors:** maternal age; hypertension/diabetes; chorionic villous sampling; number of obstetric checks in pregnancy; number of US scans in pregnancy; neonatal status;
- **Child's fragility factors:** multiple birth; ICU admission
- **Child's size factors:** gestational age; birthweight; placenta weight;
- **Obstetric history factors:** number of previous livebirths; number of previous CS;
- **Socio-demographic factors:** father's age; mother's nationality; mother's education; mother's occupation;
- **Obstetric factors:** eclampsia/pre-eclampsia; polyhydramnios; placenta previa/abruptio placenta/ ante-partum haemorrhage; non-reassuring fetal status; PROM; labour mode; obstructed labour; labour analgesia; Rh iso-immunization;

**IVD:**

- **Health care setting and timeframe:** hospital; calendar year; delivery day of week;
- **Maternal health factors:** mother's age; neonatal status; any medical assisted fertilization;
- **Child's fragility factors:** Apgar score at 5 minutes; multiple birth;
- **Child's size factors:** gestational age; placenta weight;
- **Obstetric history factors:** number of previous livebirths;
- **Socio-demographic factors:** father's age; mother's educational level;
- **Obstetric factors:** eclampsia/pre-eclampsia; PROM; labour mode; labour analgesia; presentation; Rh iso-immunization; placental secondment.

**Supplementary Table 2a.** Multivariable linear regression models for length of stay (linear endpoint) after spontaneous vaginal deliveries (SVD) and instrumental vaginal deliveries (IVD). Regression coefficients (RC) with 95% confidence interval (95%CI); Benjamini Hochberg (BH) p-value set at 5% discovery rate (bottom of each cell). obs.= complete (case analysis) observations.

| FACTORS<br>(Reference category)                        | CLASSES       | RC (95%CI)<br>BH p-value          |                                  |
|--------------------------------------------------------|---------------|-----------------------------------|----------------------------------|
|                                                        |               | SVD<br>(72,910 obs.)              | IVD<br>(7,154 obs.)              |
|                                                        |               | Calendar year (2005-2015)         | Linear term                      |
| Seasonality<br>(Reference=June-August)                 | Sep-Nov       | 0.03 (0.01; 0.05)<br>0.0057       | NS                               |
|                                                        | Dec-Feb       | 0.06 (0.04; 0.08)<br>2.18E-09     | NS                               |
|                                                        | Mar-May       | 0.06 (0.04; 0.08)<br>2.82E-09     | NS                               |
| Number of previous<br>livebirths<br>(Reference=0)      | 1             | -0.43 (-0.45; -0.42)<br>0         | -0.49 (-0.58; -0.40)<br>5.41E-25 |
|                                                        | 2             | -0.57 (-0.60; -0.54)<br>0         | -0.63 (-0.82; -0.44)<br>6.98E-10 |
|                                                        | 3             | -0.64 (-0.70; -0.59)<br>3.17E-127 | -0.76 (-1.18; -0.34)<br>0.0014   |
|                                                        | 4             | -0.66 (-0.73; -0.58)<br>1.09E-64  | -1.56 (-2.70; -0.42)<br>0.0189   |
| Number of previous CS<br>(Reference = 0)               | 1             | 0.15 (0.10; 0.19)<br>3.14E-10     | NS                               |
| Mother nationality<br>(Reference = Italian)            | Non-EU        | 0.12 (0.10; 0.14)<br>3.16E-29     | NS                               |
| Mother's education<br>(Reference =<br>University/more) | Primary/none  | 0.12 (0.06; 0.17)<br>6.91E-05     | NS                               |
|                                                        | Jr. Secondary | 0.05 (0.03; 0.07)<br>7.50E-06     | NS                               |
|                                                        | Secondary     | 0.03 (0.01; 0.04)<br>0.0027       | NS                               |
| Father's age<br>(Reference = 30-34 years)              | 20-24         | -0.06 (-0.11; -0.02)<br>0.0106    | NS                               |
|                                                        | 25-29         | -0.03 (-0.05; -0.01)<br>0.0185    | NS                               |
| Mother's age<br>(Reference = 20-24 years)              | 25-29         | 0.04 (0.01; 0.07)<br>0.0091       | NS                               |
|                                                        | 30-34         | 0.09 (0.06; 0.12)<br>5.96E-09     | NS                               |
|                                                        | 35-39         | 0.17 (0.13; 0.20)<br>2.17E-22     | NS                               |
|                                                        | 40-44         | 0.24 (0.20; 0.29)<br>4.03E-28     | 0.26 (0.12; 0.41)<br>0.0016      |
|                                                        | 45+           | 0.39 (0.23; 0.56)<br>5.41E-06     | NS                               |
| Gestational age<br>(Reference = 37-40 weeks)           | 29-32         | -0.16 (-0.31; -0.01)<br>0.0454    | NS                               |
|                                                        | 33-36         | 0.50 (0.47; 0.54)<br>5.39E-135    | 0.59 (0.40; 0.78)<br>4.43E-09    |
|                                                        | 41+           | -0.04 (-0.06; -0.03)<br>4.06E-06  | NS                               |

|                                                   |                         |                                  |                                |
|---------------------------------------------------|-------------------------|----------------------------------|--------------------------------|
| Birthweight<br>(Reference = 2.5-4.0 Kg)           | < 2.0                   | -0.21 (-0.33; -0.09)<br>0.0013   | NS                             |
|                                                   | 2.0-2.5                 | 0.36 (0.32; 0.41)<br>1.99E-52    | 0.27 (0.07; 0.47)<br>0.0206    |
|                                                   | ≥ 4.0                   | 0.08 (0.06; 0.11)<br>1.01E-08    | NS                             |
| Multiple birth<br>(Reference = singleton)         | Twins or more           | 0.52 (0.38; 0.65)<br>2.13E-13    | 0.80 (0.27; 1.32)<br>0.0098    |
| Placenta weight<br>(Reference = 500-999g)         | < 500                   | 0.03 (0.01; 0.04)<br>0.0110      | NS                             |
|                                                   | 600-999                 | 0.02 (0.01; 0.04)<br>0.0059      | NS                             |
|                                                   | 1,000-1,500             | 0.15 (0.03; 0.27)<br>0.0185      | 0.63 (0.16; 1.11)<br>0.0214    |
| Hypertension/diabetes<br>(Reference = No)         | Yes                     | 0.19 (0.13; 0.25)<br>1.82E-09    | NS                             |
| Pre delivery LoS (days)<br>(Reference <3)         | 6+                      | 0.14 (0.05; 0.23)<br>0.0027      | NS                             |
| Eclampsia/pre-eclampsia<br>(Reference = No)       | Yes                     | 1.03 (0.93; 1.14)<br>1.95E-86    | 0.90 (0.61; 1.19)<br>6.84E-09  |
| Number of US scans in pregnancy<br>(Reference <4) | 6+                      | 0.03 (0.01; 0.05)<br>0.0142      | NS                             |
| RH iso-immunization<br>(Reference = No)           | Yes                     | 0.74 (0.48; 1.00)<br>5.60E-08    | NS                             |
| Placenta previa*<br>(Reference=No)                | Yes                     | 0.27 (0.11; 0.44)<br>0.0020      |                                |
| Labour mode<br>(Reference=Spontaneous)            | Induced                 | 0.15 (0.13; 0.17)<br>7.29E-44    | 0.11 (0.04; 0.18)<br>0.0067    |
|                                                   | Augmented               | 0.10 (0.07; 0.13)<br>3.26E-11    | NS                             |
| Obstructed labour<br>(Reference=No)               | Yes                     | 0.30 (0.18; 0.42)<br>1.32E-06    | NS                             |
| Labour analgesia<br>(Reference = No)              | Yes                     | NS                               | 0.09 (0.03; 0.15)<br>0.0136    |
| ICU admission<br>(Reference = No)                 | Yes                     | -0.14 (-0.20; -0.09)<br>7.02E-07 | NS                             |
| Neonatal status<br>(Reference = Liveborn)         | Stillborn               | -1.68 (-1.83; -1.52)<br>3.80E-94 | -0.82 (-1.47; -0.16)<br>0.0285 |
| PROM<br>(Reference = No)                          | Yes                     | 0.02 (0.00; 0.05)<br>0.0336      | 0.11 (0.03; 0.20)<br>0.0214    |
| Non reassuring fetal status<br>(Reference = No)   | Yes                     | 0.57 (0.44; 0.70)<br>8.03E-17    | NS                             |
| Apgar score at 5 minutes<br>(Reference = 8+)      | < 8                     | 0.12 (0.06; 0.20)<br>0.0017      | 0.21 (0.06; 0.35)<br>0.0136    |
| Cord prolapse<br>(Reference=No)                   | Yes                     | 1.64 (0.60; 2.68)<br>0.0033      | NS                             |
| Placental Secondment<br>(Reference=Spontaneous)   | Manual/<br>Instrumental | 0.65 (0.59; 0.71)<br>1.78E-102   | 0.28 (0.15; 0.41)<br>0.0002    |
| Congenital Malformations<br>at Birth: Present     | Absent                  | 0.12 (0.06; 0.18)<br>0.0003      |                                |

\* placenta previa/abruptio placenta/ ante-partum haemorrhage

**Results of Supplementary Tables 2a and 2b belong to the same model of multivariable logistic regression models, adjusted for the following factors:**

**SVD:**

- **Health care setting and timeframe:** hospital; calendar year; delivery day of week; seasonality
- **Maternal health factors:** maternal age; hypertension/diabetes; number US scans during pregnancy; neonatal status; pre-delivery LoS;
- **Child's fragility factors:** multiple birth; Apgar score at 5 minutes; ICU admission
- **Child's size factors:** gestational age; birthweight; placenta weight;
- **Obstetric history factors:** number of previous livebirths; number of previous CS;
- **Socio-demographic factors:** paternal age; mother's nationality; mother's education;
- **Obstetric factors:** eclampsia/pre-eclampsia; non reassuring fetal status; PROM; Rh iso-immunization; placenta previa/abruptio placenta/ ante-partum haemorrhage; labour mode; obstructed labour; labour analgesia; cord prolapse; placental secondment; congenital malformations at birth.

**IVD:**

- **Health care setting and timeframe:** hospital; calendar year; number of admissions on delivery day
- **Maternal health factors:** maternal age; hypertension/diabetes; neonatal status; any medical assisted fertilization;
- **Child's fragility factors:** Apgar score at 5 minutes; multiple birth;
- **Child's size factors:** gestational age; birthweight; placenta weight;
- **Obstetric history factors:** number of previous livebirths; number of previous CS;
- **Socio-demographic factors:** mother's nationality; mother's educational level;
- **Obstetric factors:** eclampsia/pre-eclampsia; polyhydramnios; presentation; non-reassuring fetal status; placenta previa/ abruptio placenta/ ante-partum haemorrhage; PROM; presentation; labour mode; labour analgesia; placental secondment

**Supplementary table 2b.** Multivariable linear regression models for length of stay (linear endpoint) after spontaneous vaginal deliveries (SVD) and instrumental vaginal deliveries (IVD). Hospital estimates (Regression coefficients, RC) with 95% confidence interval (95%CI); Benjamini Hochberg (BH) p-value set at 5% discovery rate (bottom of each cell). obs.= complete (case analysis) observations

| HOSPITAL | DELIVERY MODE<br>RC (95%CI); with BH p value |                                |
|----------|----------------------------------------------|--------------------------------|
|          | SVD<br>(72,910 obs.)                         | IVD<br>(7,154 obs.)            |
| A        | Reference                                    | Reference                      |
| B        | 1.10 (1.07; 1.12)<br>0                       | 0.83 (0.73; 0.92)<br>4.10E-61  |
| C        | 0.39 (0.36; 0.41)<br>2.53E-158               | NS                             |
| D        | 0.95 (0.91; 0.99)<br>0                       | 0.88 (0.66; 1.11)<br>2.62E-13  |
| E        | 0.64 (0.61; 0.67)<br>0                       | 0.68 (0.55; 0.82)<br>1.29E-21  |
| F        | 0.26 (0.23; 0.30)<br>1.10E-48                | NS                             |
| G        | NS                                           | -0.22 (-0.33; -0.11)<br>0.0002 |
| H        | 0.31 (0.29; 0.34)<br>1.38E-128               | 0.15 (0.05; 0.26)<br>0.0136    |
| I        | 0.67 (0.64; 0.70)<br>0                       | 0.55 (0.41; 0.69)<br>1.14E-13  |
| J        | 0.44 (0.42; 0.47)<br>5.70E-232               | 0.39 (0.28; 0.50)<br>3.18E-11  |
| K        | 0.65 (0.62; 0.68)<br>0                       | 0.43 (0.32; 0.55)<br>2.38E-12  |

Results of Supplementary Tables 2a and 2b belong to the same model of multivariable logistic regression models, adjusted for the following factors:

- SVD:**
- **Health care setting and timeframe:** hospital; calendar year; delivery day of week; seasonality
  - **Maternal health factors:** maternal age; hypertension/diabetes; number US scans during pregnancy; neonatal status; pre-delivery LoS;
  - **Child's fragility factors:** multiple birth; Apgar score at 5 minutes; ICU admission
  - **Child's size factors:** gestational age; birthweight; placenta weight;
  - **Obstetric history factors:** number of previous livebirths; number of previous CS;
  - **Socio-demographic factors:** paternal age; mother's nationality; mother's education;
  - **Obstetric factors:** eclampsia/pre-eclampsia; oligohydramnios; polyhydramnios; non reassuring fetal status; PROM; Rh iso-immunization; labour mode; obstructed labour; placenta previa/abruptio placenta/ ante-partum haemorrhage; labour analgesia; cord prolapse; placental secondment; congenital malformations at births.

- IVD:**
- **Health care setting and timeframe:** hospital; calendar year; number of admissions on delivery day; seasonality;
  - **Maternal health factors:** maternal age; hypertension/diabetes; neonatal status; any medical assisted fertilization;
  - **Child's fragility factors:** Apgar score at 5 minutes; multiple birth;
  - **Child's size factors:** gestational age; birthweight; placenta weight;
  - **Obstetric history factors:** number of previous livebirths; number of previous CS;
  - **Socio-demographic factors:** mother's nationality; mother's educational level;
  - **Obstetric factors:** eclampsia/pre-eclampsia; polyhydramnios; presentation; non-reassuring fetal status; placenta previa/ abruptio placenta/ ante-partum haemorrhage; PROM; presentation; labour mode; labour analgesia; placental secondment



**Supplementary Table 3.** Adjusted<sup>&</sup> mean of length of hospital stay (LoS, in days) ± standard deviation (SD), by vaginal delivery mode (SVD vs. IVD), level of pregnancy risk (high vs. low), nationality of the mother (EU vs. non-EU) and maternity centre. EU= European Union; SVD= Spontaneous Vaginal Delivery; IVD=Instrumental Vaginal Delivery.

| FACTORS              | CLASSES | LoS ± SD (days)       |                        |                       |                        |
|----------------------|---------|-----------------------|------------------------|-----------------------|------------------------|
|                      |         | SVD                   |                        | IVD                   |                        |
|                      |         | Low risk pregnancies* | High Risk pregnancies# | Low risk pregnancies* | High Risk pregnancies# |
| Mother's nationality | EU      | 2.7 ± 0.4             | 3.0 ± 0.5              | 3.1 ± 0.4             | 3.4 ± 0.5              |
|                      | Non-EU  | 2.8 ± 0.4             | 3.1 ± 0.5              | 3.3 ± 0.4             | 3.4 ± 0.5              |
| Hospital             | A       | 2.3 ± 0.2             | 2.5 ± 0.3              | 2.8 ± 0.3             | 3.1 ± 0.3              |
|                      | B       | 3.4 ± 0.2             | 3.6 ± 0.3              | 3.6 ± 0.3             | 3.9 ± 0.3              |
|                      | C       | 2.7 ± 0.2             | 2.8 ± 0.3              | 3.0 ± 0.2             | 3.2 ± 0.3              |
|                      | D       | 3.3 ± 0.2             | 3.4 ± 0.3              | 3.5 ± 0.2             | 3.8 ± 0.3              |
|                      | E       | 3.0 ± 0.2             | 3.1 ± 0.3              | 3.6 ± 0.2             | 3.7 ± 0.3              |
|                      | F       | 2.6 ± 0.2             | 2.7 ± 0.3              | 2.8 ± 0.2             | 3.0 ± 0.3              |
|                      | G       | 2.3 ± 0.2             | 2.5 ± 0.3              | 2.6 ± 0.2             | 2.8 ± 0.3              |
|                      | H       | 2.6 ± 0.2             | 2.8 ± 0.3              | 3.0 ± 0.2             | 3.2 ± 0.3              |
|                      | I       | 3.0 ± 0.2             | 3.1 ± 0.3              | 3.4 ± 0.2             | 3.5 ± 0.5              |
|                      | J       | 2.8 ± 0.2             | 2.9 ± 0.3              | 3.1 ± 0.3             | 3.4 ± 0.4              |
|                      | K       | 2.9 ± 0.2             | 3.1 ± 0.3              | 3.2 ± 0.3             | 3.5 ± 0.3              |

<sup>&</sup> Mean LoS adjusted for all factors displayed at the bottom of Supplementary Tables 2a and 2b, for both SVD and IVD.

• **pregnancies simultaneously meeting all the following conditions:**

No hypertension/diabetes of the mother; No assisted medical fertilization; singleton pregnancies; No eclampsia/pre-eclampsia; cephalic presentation; livebirth; pre-delivery LoS < 3 days; No oligohydramnios; No polyhydramnios; Apgar score at 5 minute ≥ 8; Gestation 37-40 weeks; Birthweight 2.500-4.000 g; Placenta weighing 500-599g; Spontaneous labour; No administration of labour analgesia; No fetal distress; No obstructed labour; No PROM; Spontaneous placental secondment; No cord prolapse; No Rh iso-immunization; no congenital malformations at birth.

# **pregnancies meeting AT LEAST ONE of the following conditions:**

Any assisted medical fertilization; Multiple births; Eclampsia/pre-eclampsia; Breech/Shoulder presentation; Stillbirth; Pre-delivery LoS ≥ 3 days; Oligohydramnios; Polyhydramnios; Apgar score at 5 minute < 8; Gestation <37 or ≥ 41 weeks; Birthweight <2,5 or ≥ 4.0 Kg; Placenta weighing <500g or ≥600g; Labour induced or augmented; Administration of labour analgesia; Non-reassuring fetal status; Obstructed labour; PROM; Manual/instrumental placental secondment; Cord prolapse; Rh iso-immunization; congenital malformations at birth.
